# Supplementary material
Source: PubMed Central journal article supplement (PMC2965025)
Supplement: NIHMS227078-supplement-2.pdf [file NIHMS227078-supplement-2.pdf]

|                     | CDR1 $\beta$ |    |    |    |    |    | CDR2 $\beta$ |    |    |    |    |    |    |    |    |
|---------------------|--------------|----|----|----|----|----|--------------|----|----|----|----|----|----|----|----|
|                     | 24           | 25 | 26 | 27 | 28 | 30 | 46           | 47 | 48 | 49 | 50 | 51 | 52 | 53 | 54 |
| human V $\beta$ 11  | T            | M  | G  | H  | D  | K  | Y            | S  | Y  | G  | V  | N  | S  | T  | E  |
| mouse V $\beta$ 8.2 | T            | N  | N  | H  | N  | N  | Y            | S  | Y  | G  | A  | G  | S  | T  | E  |
| mouse V $\beta$ 8.1 | T            | N  | N  | H  | D  | Y  | Y            | S  | Y  | V  | A  | D  | S  | T  | E  |
| mouse V $\beta$ 8.3 | T            | N  | S  | H  | N  | Y  | Y            | S  | Y  | G  | A  | G  | N  | L  | R  |
| mouse V $\beta$ 7   | D            | M  | S  | H  | E  | T  | I            | S  | Y  | D  | V  | D  | S  | N  | S  |
| mouse V $\beta$ 2   | K            | N  | S  | Q  | Y  | P  | T            | L  | R  | S  | P  | G  | D  | K  | E  |
| mouse V $\beta$ 9   | T            | M  | N  | H  | D  | T  | F            | Y  | Y  | D  | K  | I  | L  | N  | R  |
| mouse V $\beta$ 14  | K            | G  | K  | S  | S  | P  | Y            | S  | I  | T  | V  | G  | Q  | V  | E  |
| mouse V $\beta$ 10  | T            | L  | G  | H  | D  | T  | S            | Y  | N  | N  | K  | Q  | L  | I  | V  |
