# Supplementary material
Source: PubMed Central journal article supplement (PMC2965025)

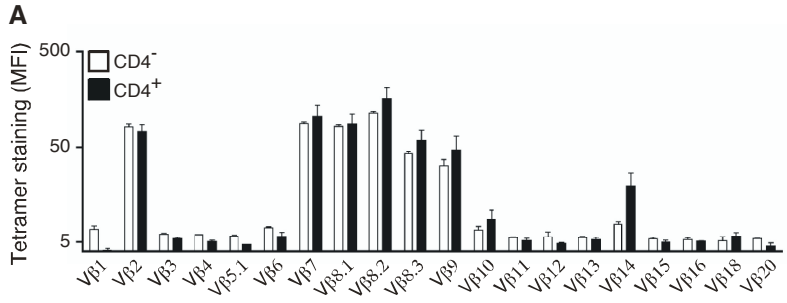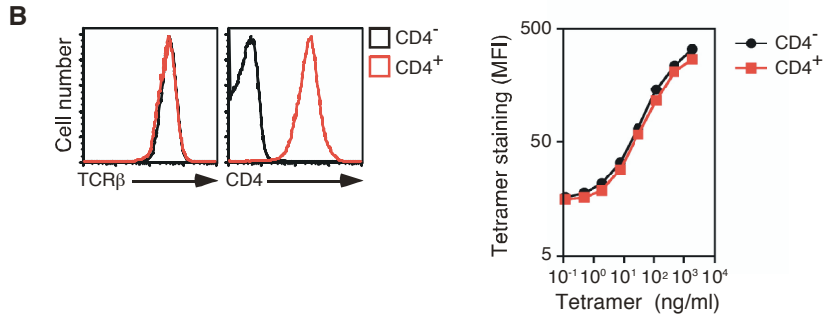

Supplement: NIHMS227078-supplement-1.pdf [file NIHMS227078-supplement-1.pdf]

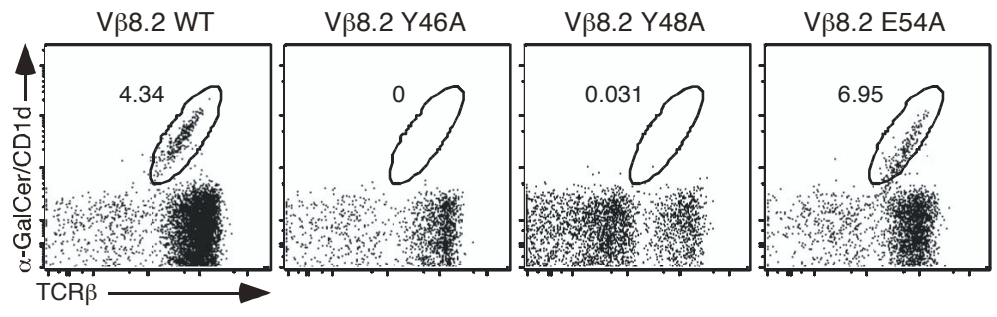

Supplement: NIHMS227078-supplement-3.pdf [file NIHMS227078-supplement-3.pdf]

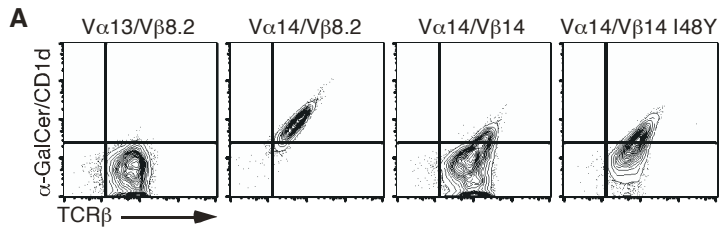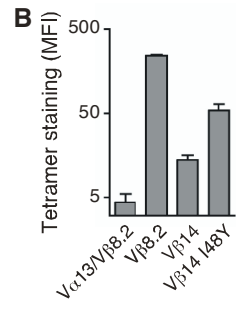

Supplement: NIHMS227078-supplement-4.pdf [file NIHMS227078-supplement-4.pdf]
